# Supplementary material for: Phytotoxic Action of Silver Nanoparticles on Lemna minor: Multi-Parameter Analysis of Different Physiological Processes
Source: MDPI journal article supplement (doi:10.3390/plants12020343), 2023-01-11
Supplement: s1 [file s1]

Table S1. Pearson's coefficient of correlation between parameters (r values).

|               | Ag       | K        | Mg       | P        | N        | Ca       | RGR fr   | RGR FW   | Fv/Fm    | $\Phi_{PSII}$ | NPQ      | Chl a    | Chl b    | Car      | MDA      | C=O      | APX      | CAT      | SOD      | GPX      | GST      | GSH      |
|---------------|----------|----------|----------|----------|----------|----------|----------|----------|----------|---------------|----------|----------|----------|----------|----------|----------|----------|----------|----------|----------|----------|----------|
| K             | -0.84982 | 1        |          |          |          |          |          |          |          |               |          |          |          |          |          |          |          |          |          |          |          |          |
| Mg            | -0.82356 | 0.869732 | 1        |          |          |          |          |          |          |               |          |          |          |          |          |          |          |          |          |          |          |          |
| P             | -0.53477 | 0.407226 | 0.361676 | 1        |          |          |          |          |          |               |          |          |          |          |          |          |          |          |          |          |          |          |
| N             | -0.70804 | 0.477977 | 0.607211 | 0.614331 | 1        |          |          |          |          |               |          |          |          |          |          |          |          |          |          |          |          |          |
| Ca            | 0.707626 | -0.71072 | -0.66916 | -0.43059 | -0.54255 | 1        |          |          |          |               |          |          |          |          |          |          |          |          |          |          |          |          |
| RGR fr        | -0.63298 | 0.593545 | 0.484212 | 0.0081   | 0.057455 | -0.38197 | 1        |          |          |               |          |          |          |          |          |          |          |          |          |          |          |          |
| RGR FW        | -0.6884  | 0.638978 | 0.510908 | 0.245378 | 0.267604 | -0.51254 | 0.906785 | 1        |          |               |          |          |          |          |          |          |          |          |          |          |          |          |
| Fv/Fm         | -0.71772 | 0.677842 | 0.498378 | 0.511002 | 0.229402 | -0.50357 | 0.257762 | 0.318186 | 1        |               |          |          |          |          |          |          |          |          |          |          |          |          |
| $\Phi_{PSII}$ | -0.67955 | 0.695045 | 0.779106 | 0.366016 | 0.517167 | -0.59229 | 0.223196 | 0.250177 | 0.503131 | 1             |          |          |          |          |          |          |          |          |          |          |          |          |
| NPQ           | 0.475264 | -0.20325 | -0.17797 | -0.4542  | -0.3587  | -0.04308 | 0.42243  | 0.265093 | -0.50652 | -0.35568      | 1        |          |          |          |          |          |          |          |          |          |          |          |
| Chl a         | -0.44535 | 0.301759 | 0.312588 | 0.397345 | 0.539505 | -0.5168  | 0.253127 | 0.459671 | 0.364037 | 0.3393        | -0.28498 | 1        |          |          |          |          |          |          |          |          |          |          |
| Chl b         | -0.14017 | 0.000699 | -0.11687 | 0.299449 | 0.078935 | -0.31294 | 0.00411  | 0.167876 | 0.50185  | 0.112338      | -0.34256 | 0.74377  | 1        |          |          |          |          |          |          |          |          |          |
| Car           | -0.42751 | 0.159739 | 0.10821  | 0.448955 | 0.377366 | -0.16173 | 0.041661 | 0.20327  | 0.617275 | 0.113135      | -0.63126 | 0.731531 | 0.781045 | 1        |          |          |          |          |          |          |          |          |
| MDA           | 0.770061 | -0.5413  | -0.72597 | -0.36989 | -0.81707 | 0.613579 | -0.36697 | -0.36151 | -0.28198 | -0.66374      | 0.048515 | -0.45243 | 0.008198 | -0.20281 | 1        |          |          |          |          |          |          |          |
| C=O           | 0.811921 | -0.6818  | -0.60302 | -0.58501 | -0.37417 | 0.63498  | -0.4061  | -0.46216 | -0.85704 | -0.41322      | 0.382946 | -0.387   | -0.39515 | -0.56748 | 0.382692 | 1        |          |          |          |          |          |          |
| APX           | 0.528448 | -0.60489 | -0.77317 | -0.12785 | -0.36244 | 0.328938 | -0.20459 | -0.12235 | -0.31411 | -0.78267      | 0.198041 | -0.17894 | 0.220713 | 0.063255 | 0.603822 | 0.180756 | 1        |          |          |          |          |          |
| CAT           | 0.865964 | -0.78358 | -0.68408 | -0.6202  | -0.4319  | 0.694075 | -0.45871 | -0.52642 | -0.89046 | -0.5313       | 0.348475 | -0.3812  | -0.35068 | -0.51116 | 0.473887 | 0.977733 | 0.287589 | 1        |          |          |          |          |
| SOD           | 0.806683 | -0.61971 | -0.5007  | -0.56581 | -0.46203 | 0.629309 | -0.41584 | -0.50575 | -0.81086 | -0.49193      | 0.4124   | -0.49433 | -0.53443 | -0.64577 | 0.461251 | 0.909027 | 0.077386 | 0.914025 | 1        |          |          |          |
| GPX           | 0.766529 | -0.61959 | -0.70362 | -0.48265 | -0.7673  | 0.670194 | -0.58215 | -0.60953 | -0.41656 | -0.7387       | 0.194645 | -0.60491 | -0.16009 | -0.28521 | 0.90155  | 0.391483 | 0.715781 | -0.49319 | 0.436036 | 1        |          |          |
| GST           | 0.838471 | -0.73682 | -0.78928 | -0.47162 | -0.61444 | 0.804768 | -0.12253 | -0.17628 | -0.68811 | -0.785        | 0.362557 | -0.42884 | -0.22366 | -0.29685 | 0.711217 | 0.678236 | 0.666332 | 0.738789 | 0.614509 | 0.808516 | 1        |          |
| GSH           | -0.7334  | 0.735668 | 0.810865 | 0.223382 | 0.326256 | -0.55228 | 0.220417 | 0.125589 | 0.633422 | 0.634457      | -0.21223 | 0.047303 | -0.14468 | 0.050722 | -0.55105 | -0.60694 | -0.76289 | -0.66279 | -0.401   | -0.59165 | -0.84953 | 1        |
| ROS           | 0.537259 | -0.06989 | -0.10725 | -0.84639 | -0.62154 | 0.24567  | -0.4822  | -0.5695  | -0.31805 | -0.14234      | 0.354723 | -0.28171 | -0.2601  | -0.46477 | 0.437922 | 0.445122 | 0.10475  | -0.4469  | 0.508993 | 0.397894 | 0.314419 | -0.05321 |

Numbers marked with red color are significant at  $p < 0.05$ .

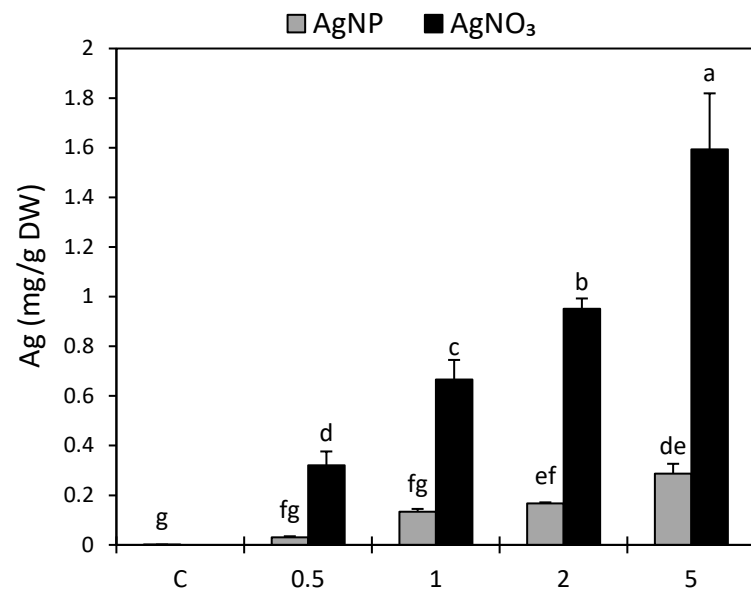

**Figure S1.** Ag content in duckweed after 7-day treatment with silver nanoparticles (AgNPs) and ionic silver (AgNO<sub>3</sub>) in concentration range 0.5-5 mg/L or in control plants (C). Standard deviations are presented by error bars. Different letters indicate significantly different values at  $P < 0.05$  according to ANOVA.
